# Ultrasound Produces Extensive Brain Activation via a Cochlear Pathway

**Authors:** Hongsun Guo<sup>1,\*</sup>, Mark Hamilton II<sup>1,\*</sup>, Sarah J. Offutt<sup>2</sup>,  
Cory D. Gloeckner<sup>1</sup>, Tianqi Li<sup>1</sup>, Yohan Kim<sup>2</sup>, Wynn Legon<sup>3,4</sup>,  
Jamu K. Alford<sup>2</sup>, and Hubert H. Lim<sup>1,5,6,#</sup>

## **Affiliations:**

<sup>1</sup>Department of Biomedical Engineering

University of Minnesota, Minneapolis, Minnesota 55455, USA

<sup>2</sup>Medtronic, Minneapolis, Minnesota 55432, USA

<sup>3</sup>Department of Rehabilitation Medicine

University of Minnesota, Minneapolis, Minnesota 55455, USA

<sup>4</sup>Department of Neurological Surgery

University of Virginia School of Medicine, Charlottesville, Virginia 22908, USA

<sup>5</sup>Institute for Translational Neuroscience

University of Minnesota, Minneapolis, Minnesota 55455, USA

<sup>6</sup>Department of Otolaryngology, Head and Neck Surgery

University of Minnesota, Minneapolis, Minnesota 55455, USA

\*These authors contributed equally

#Senior author

Correspondence should be addressed to HG ([guoxx691@umn.edu](mailto:guoxx691@umn.edu))

## Summary

Ultrasound (US) can noninvasively activate intact brain circuits, making it a promising neuromodulation technique. However, little is known about the underlying mechanism. Here, we apply transcranial US and perform brain mapping studies in guinea pigs using extracellular electrophysiology. We find that US elicits extensive activation across cortical and subcortical brain regions. However, transection of the auditory nerves or removal of cochlear fluids eliminates the US-induced activity, revealing an indirect auditory mechanism for US neural activation. US likely vibrates the cerebrospinal fluid in the brain, which is continuous with the fluid in the cochlea via cochlear aqueducts; thus, US can activate the ascending auditory pathways and other non-auditory regions through cross-modal projections. This finding of a cochlear fluid-induced vibration mechanism challenges the idea that US can directly activate neurons in the intact brain, suggesting that future US stimulation studies will need to control for this effect to reach reliable conclusions.

## 1 Introduction

2 Multiple neuromodulation techniques, such as deep brain stimulation (DBS), transcranial magnetic  
3 stimulation (TMS), and transcranial direct current stimulation (tDCS) have been used for treating various  
4 brain disorders, including tremors, depression, seizures, schizophrenia, pain, and tinnitus (Hallett, 2000;  
5 Johnson et al., 2013; Nitsche et al., 2008; Perlmutter and Mink, 2006). However, DBS and other invasive  
6 approaches have risks associated with surgery and involve high costs. TMS, tDCS and other noninvasive  
7 approaches do not require surgery, but they do not sufficiently achieve targeted activation (Brunoni et al.,  
8 2011; Deng et al., 2013; Markovitz et al., 2015a). More recently, ultrasound (US) stimulation has emerged  
9 as a potential approach that can address the trade-offs faced by modern neuromodulation technologies, in  
10 that it can be applied noninvasively but with the ability to activate or modulate targeted brain regions. For  
11 example, using indirect methods for measuring targeted neural activation, such as electroencephalography  
12 or perceptual tests, US has shown to activate or modulate primary somatosensory cortex (SC1) and primary  
13 visual cortex in humans or animals (Fry et al., 1958; Lee et al., 2015, 2016; Legon et al., 2014; Yoo et al.,  
14 2011). Primary motor cortex also appears to be activated with US stimulation in animals based on induced  
15 body or limb movements and electromyography measurements (King et al., 2014; Tufail et al., 2010; Ye et  
16 al., 2016; Yoo et al., 2011), though similar motor movements have not yet been achievable in humans.

17 There is growing interest and research in US neuromodulation, with an increasing number of  
18 publications in recent years. However, to our knowledge, there are still no *in vivo* mapping studies of neural  
19 responses within the brain that have confirmed that US is directly and locally activating neurons. In this  
20 study, we directly and simultaneously recorded across multiple locations within the brain, including SC1,  
21 primary auditory cortex (A1) and auditory midbrain using multi-site electrode arrays in an *in vivo* guinea  
22 pig preparation, and characterized the spatial neural activation pattern in response to US stimulation  
23 targeted at SC1 or A1.

24 Using similar US stimulation parameters and levels published in previous studies (Bystritsky et al.,  
25 2011; Mehić et al., 2014; Ye et al., 2016), we observed extensive activation across different brain regions,  
26 including A1 and SC1, with activation patterns that were unexpectedly consistent across different US  
27 stimulation locations, even when placing the transducer on the skull far from our recording location, or on  
28 the eyeball. More surprisingly, bilateral transection of the auditory nerves or removal of fluids from both  
29 cochleas caused the US-induced activity to disappear. These findings indicate that US stimulation across a  
30 wide range of parameters is activating the cochlea, which in turn activates the ascending auditory pathway  
31 up to A1 and possibly other cortical areas through cross-modal projections (Aitkin et al., 1981; Clemo et  
32 al., 2007; Foxe et al., 2000; Gruters and Groh, 2012; Murray and Wallace, 2011; Ramachandran and

33 Altschuler, 2009; Schofield et al., 2011; Sigrist et al., 2013; Stein and Stanford, 2008). Cochlear vibration  
34 and activation may be achieved through US-induced vibration of the cerebrospinal fluid (CSF) in the head,  
35 which is continuous with the fluid in the cochlea via cochlear aqueducts (Gopen et al., 1997; Sohmer and  
36 Freeman, 2004; Sohmer et al., 2000). Combined with the results presented in the companion paper by Sato  
37 et al. investigating US-induced neural activity and motor responses in intact and deafened mice (Tomokazu  
38 Sato et al., 2017), these findings reveal an unexpected auditory activation effect caused by US stimulation,  
39 and the critical need for further studies to accurately characterize the direct neuromodulation capabilities of  
40 US.

## 41 **Results**

### 42 **Indirect Activation of Central Auditory Circuits Using Pulsed Ultrasound**

43 We first examined if pulsed US could directly activate the auditory cortex, since previous studies already  
44 reported that US could activate motor, visual, and somatosensory cortices (King et al., 2014; Lee et al.,  
45 2015, 2016; Tufail et al., 2010; Ye et al., 2016; Yoo et al., 2011). We recorded multi-unit spike activity  
46 (displayed as post-stimulus time histograms, PSTHs) and local field potentials from A1 with a 32-site  
47 electrode array while stimulating A1 with pulsed US (0.22 MHz, 100 kPa, 0.1 msec pulse duration (PD),  
48 single pulse, 500 msec trial duration (TD); Figure 1A). The transducer was attached to a plastic focusing  
49 cone filled with degassed deionized water, and the cone tip was coupled to the brain with degassed agarose.  
50 The US-evoked auditory responses were observed across all 32 sites (Figure 1C). The spike and negative-  
51 peak LFP responses to US occurred within 50 msec of the stimulus onset, which is consistent with the time  
52 scale of neural activity in primary motor cortex from a previously published study (Tufail et al., 2010). US-  
53 evoked auditory responses could be achieved with numerous US parameters (Table S1).

54 Surprisingly, the US-induced responses across sites closely resembled the activity evoked by  
55 audible broadband noise at 70 decibels sound pressure level (dB SPL; Figure 1B). We questioned if the  
56 animal was sensitive to ultrasound being directly generated by the transducer or was hearing audible sound  
57 during US application, even though we could not hear any sound originating from the US transducer. As  
58 shown in Figure 2B, we placed the transducer on US gel that was unconnected to the animal's body and  
59 recorded from A1 while presenting US stimulation (220 kHz, 100 kPa, 10 msec PD, 500 msec TD). We  
60 could not elicit any US-induced activity in A1, even when placing the transducer closer to the animal's ears.  
61 In contrast, A1 activity was clearly observed whenever the transducer was coupled to the animal's head or  
62 brain (Figure 2A; also see Figure 1C). Unexpectedly, the transducer could be positioned anywhere on the  
63 head or body, even on the eyeball, and still elicit strong and similar patterns of A1 activity as long as the  
64 transducer was directly coupled to the animal (Figure 2D-H). These results contradict the localized brain  
65 activation pattern that would be expected from the focused energy profile achievable with US (Figure S1).

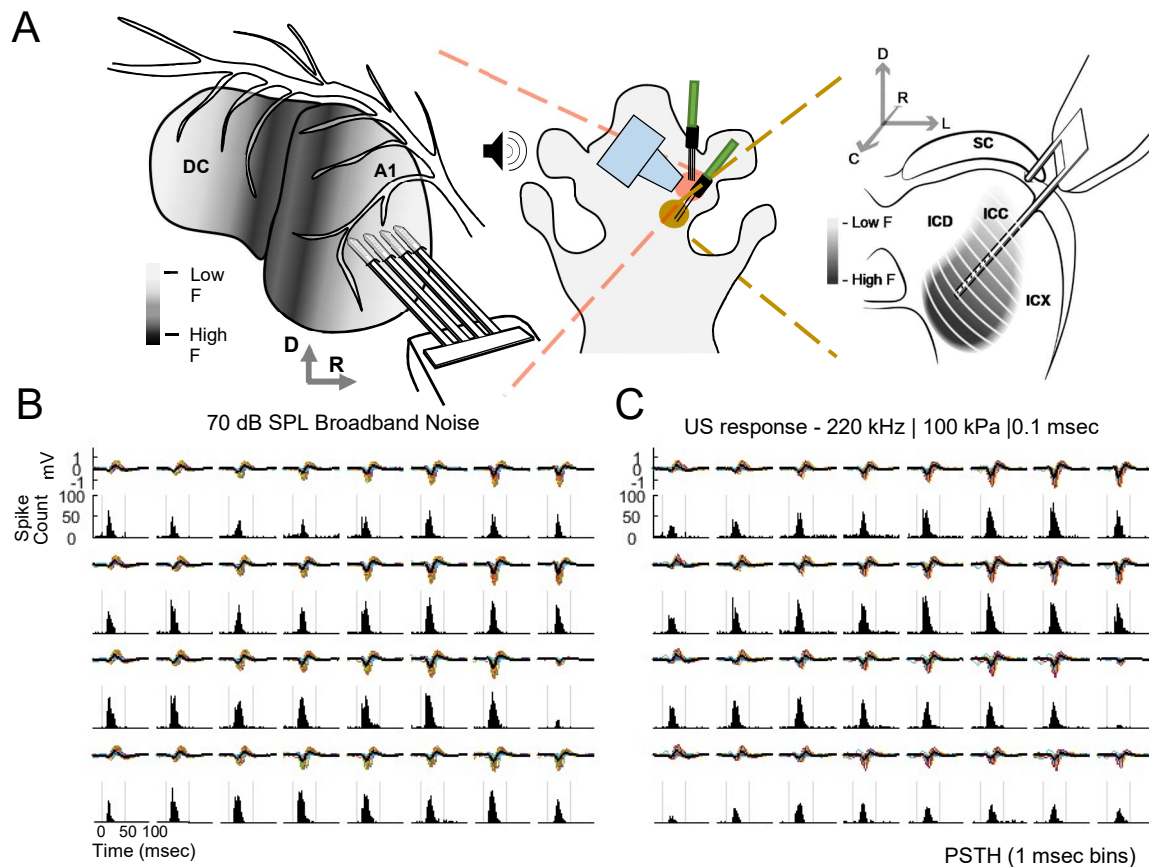

66 **Figure 1. A1 responses to US stimulation and broadband noise (BN).** A Two 32-site electrode arrays  
67 were inserted into the right ICC and A1 of anesthetized guinea pigs, and both probes were positioned such  
68 that recorded neurons were tuned to frequencies that spanned a wide range. The US transducer was placed  
69 over the exposed A1 (coupled with agar), and acoustic stimulation was presented to the left ear through a  
70 hollow ear bar. B A1 responses to 70 dB SPL BN acoustic stimulation are shown. For each recording site  
71 (i.e., subplot), the local field potentials (LFPs) across 100 trials are plotted in the top portion and the post-  
72 stimulus time histograms (PSTHs) of spiking activity are plotted in the bottom portion. Each row  
73 corresponds to the linearly spaced electrode sites along one shank of the 4-shank probe. Activity is observed  
74 on all 32 sites. Time is relative to stimulus onset. C A1 responses to US stimulation (220 kHz, 100 kPa, 0.1  
75 msec PD, 500 msec TD) are shown. Similar to BN responses in B, activity is observed on all 32 sites.

76

77 In two animals we also recorded simultaneously from A1 and from the central nucleus of the  
78 inferior colliculus (ICC; Figure 1A), which is the main ascending region of the auditory midbrain that then  
79 projects up to the thalamus and A1. The original motivation for recording from ICC in response to US  
80 stimulation of A1 was to characterize the spatial spread of US activation in A1. A previous study from our

81 lab showed that electrical stimulation of A1 activates descending cortical-to-midbrain feedback pathways  
 82 to ICC that are spatially organized in a topographic pattern, in which A1 neurons sensitive to a given pure  
 83 tone frequency activate ICC neurons that are sensitive to a similar pure tone frequency (Markovitz et al.,  
 84 2013). Thus, it is possible to record across this tonotopic gradient of the ICC while stimulating a specific

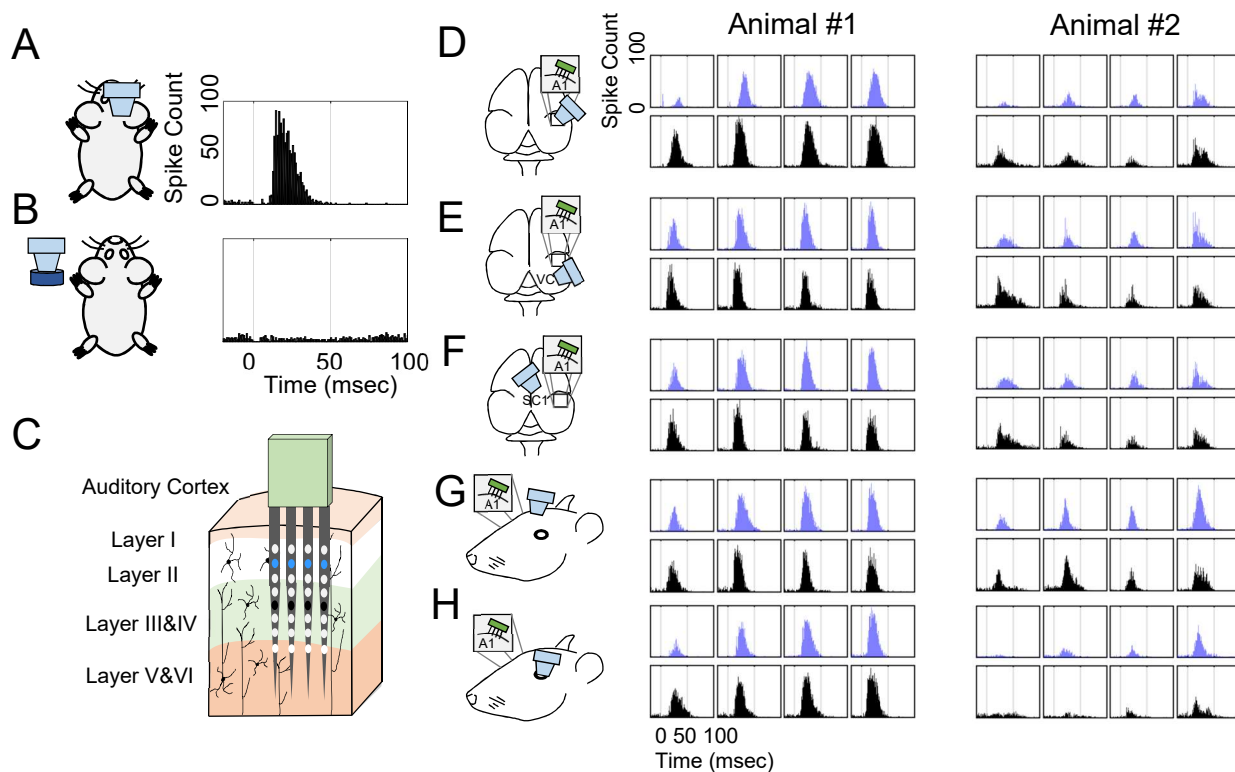

85 **Figure 2. A1 responses to US stimulation of different regions in the brain, on the head, and coupling gel**  
 86 **detached from the body.** **A** US stimulation (220 kHz, 100 kPa, 10 msec PD, 500 msec TD) of A1 elicited  
 87 spike activity over all 32 sites. Only one typical site is shown here. **B** US stimulation of coupling gel  
 88 detached from the animal's body with same US parameters in **A** does not elicit any A1 spike activity over  
 89 all 32 sites, confirming the responses in **A** are not attributed to an external sound generated by the US  
 90 transducer. The same site in **A** is shown here. **C** Diagram of Layer II (blue) and Layer III/IV (black) of  
 91 auditory cortex is shown, which corresponds to the blue and black PSTHs shown in **D-H**. **D-H** Diagrams  
 92 and PSTHs representing spike responses to US stimulation (220 kHz, 100 kPa, 10 msec PD, 500 msec TD)  
 93 of exposed auditory cortex (**D**), exposed visual cortex (**E**), exposed somatosensory cortex (**F**), the left side  
 94 of the intact skull (**G**), and the left eyeball (**H**) in two animals are shown. All stimulation locations result in  
 95 A1 activation of 64 sites across the two animals and are surprisingly similar in each animal even though the  
 96 stimulation targets were quite different. All US setups in **D-H** were coupled to the animal with agar. Time  
 97 is relative to stimulus onset.

98 region of A1 and use the ICC read-out to assess the spread of activation across A1. Stimulation with US of  
99 different A1 locations elicited extensive activity throughout ICC with no indication of localized effects.  
100 Unexpectedly, the first spike latencies in ICC were much shorter than those in A1, which contradicts what  
101 would be expected if we were directly activating A1 that then activated descending projections to ICC  
102 (Figure 3). This unexpected result occurred regardless of the US stimulation parameters, in which the mean  
103 first spike latencies across US parameters were significantly shorter for ICC compared to A1 ( $5.43 \pm 0.15$   
104 versus  $17.96 \pm 1.35$  msec,  $P \ll 0.001$ ). Furthermore, the first spike latencies observed for A1 and ICC in  
105 response to US stimulation approximately resembled those for audible broadband noise stimulation (Figure  
106 3, rightmost bars), suggesting US may be activating the ascending auditory pathway at the peripheral or  
107 cochlear level.

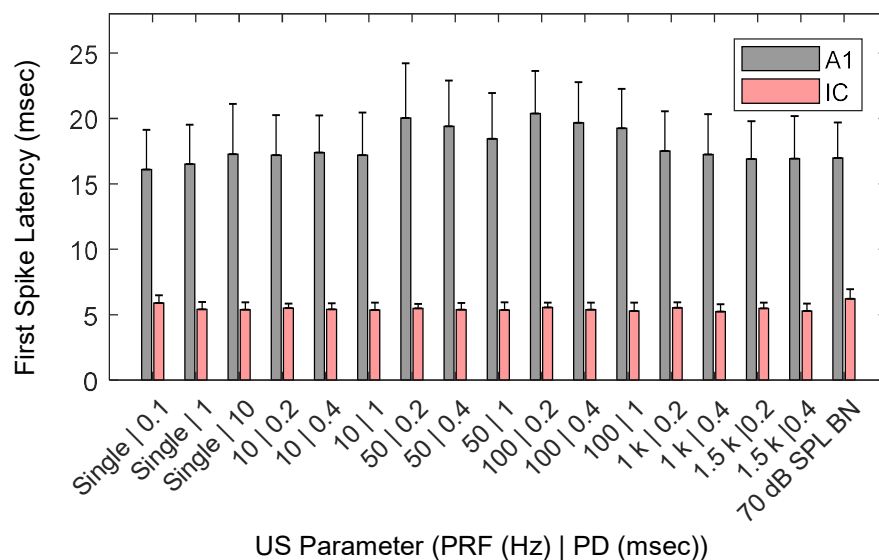

108 **Figure 3. First Spike Latencies of A1 and ICC in response to US stimulation of A1.** First spike latencies  
109 of ICC and A1 responses to US stimulation of exposed A1 at 200 kPa are shown. One condition of 70 dB  
110 SPL BN acoustic stimulation is also shown at the far right of the plot for comparison. For each stimulation  
111 parameter, latencies were averaged across all recording sites and plotted with standard error bars. In general,  
112 IC neurons had shorter latencies than A1, suggesting that ICC was activated before A1, similar to what  
113 would be expected for acoustic-driven activation along the ascending auditory pathway. US-induced  
114 latencies were similar to those of BN stimulation, indicating that US may be activating the auditory system  
115 early in the ascending auditory pathway. Data are represented as mean  $\pm$  SD, which is pooled from 91  
116 recording sites across 2 animals.

117





133 the recording probe show strong spiking activity. **C-D** A1 recordings in response to BN and US stimulation  
134 were repeated after bilateral transection of the auditory nerves as shown in **C** and **D** respectively. In both  
135 cases, there is no apparent stimulus-driven activity. **E-F** When increasing US pressure up to 2 MPa, there  
136 were only less than 5% of sites activated per animal ( $n=3$ ; total number of sites per condition was 95) that  
137 responded to US stimulation of A1 after bilateral transection of the auditory nerves. Only one animal out  
138 of three showed residual activity after nerves were cut, and only for a small number of sites (example shown  
139 in **F**). See also Table S2. Time is relative to stimulus onset. Data are represented as mean  $\pm$  SD.

140

141 statistically significant response on one site (red box) after nerve transection. Other US parameters at high  
142 pressures in that same animal were able to elicit activity on one or a few sites (Figure 4E and Table S2).  
143 Considering the inability to repeat these results in any other animal and the long onset latencies of the US-  
144 induced responses after nerve transection (i.e., still between 11-16 msec), we believe the auditory nerves  
145 may not have been fully transected in that one animal. Overall, the results from these control experiments  
146 confirm that all or nearly all of the activity observed in A1 in response to US is caused by a peripheral  
147 auditory pathway passing through the auditory nerve to the brain. Later, we show that this peripheral  
148 pathway requires the fluids within the cochlea. As to whether direct brain activation is possible using  
149 different US parameters than what was used in our study requires further investigation.

### 150 **Indirect Activation of Somatosensory Cortex Using Pulsed Ultrasound**

151 Since previous studies demonstrating US-induced activity in the brain targeted other cortical regions than  
152 the auditory cortex, we questioned whether our findings concerning auditory activation were specific to A1.  
153 We performed several experiments targeting somatosensory cortex with US, since multiple studies have  
154 shown or suggested that US can evoke or modulate spike activity in SC1 and supplementary eye field (Lee  
155 et al., 2015; Legon et al., 2014; Wattiez et al., 2017). We implanted a 4-shank, 32-site electrode array into  
156 SC1 and recorded multi-unit spike activity in response to pulsed US targeted towards SC1 (200 kPa, 1 kHz  
157 pulse repetition frequency (PRF), 0.5 msec PD, 20 pulses, 6 sec TD; Figure 5A). As shown in Figure 5E,  
158 US-evoked SC1 activity was observed on 31 out of 32 sites (based on statistical analysis described in the  
159 Methods) in one animal. The raster plot for a typical site (#29 in Figure 5E) shows that the spikes were  
160 consistently observed with a wide temporal range across 100 trials. Results across multiple animals show  
161 that US could reliably elicit spike activity in SC1 with a mean percentage of activated sites of  $60.3 \pm 23.8\%$   
162 across seven animals (Figure 5B). A wide range of US parameters we tested could elicit activity in SC1  
163 (Table S3).

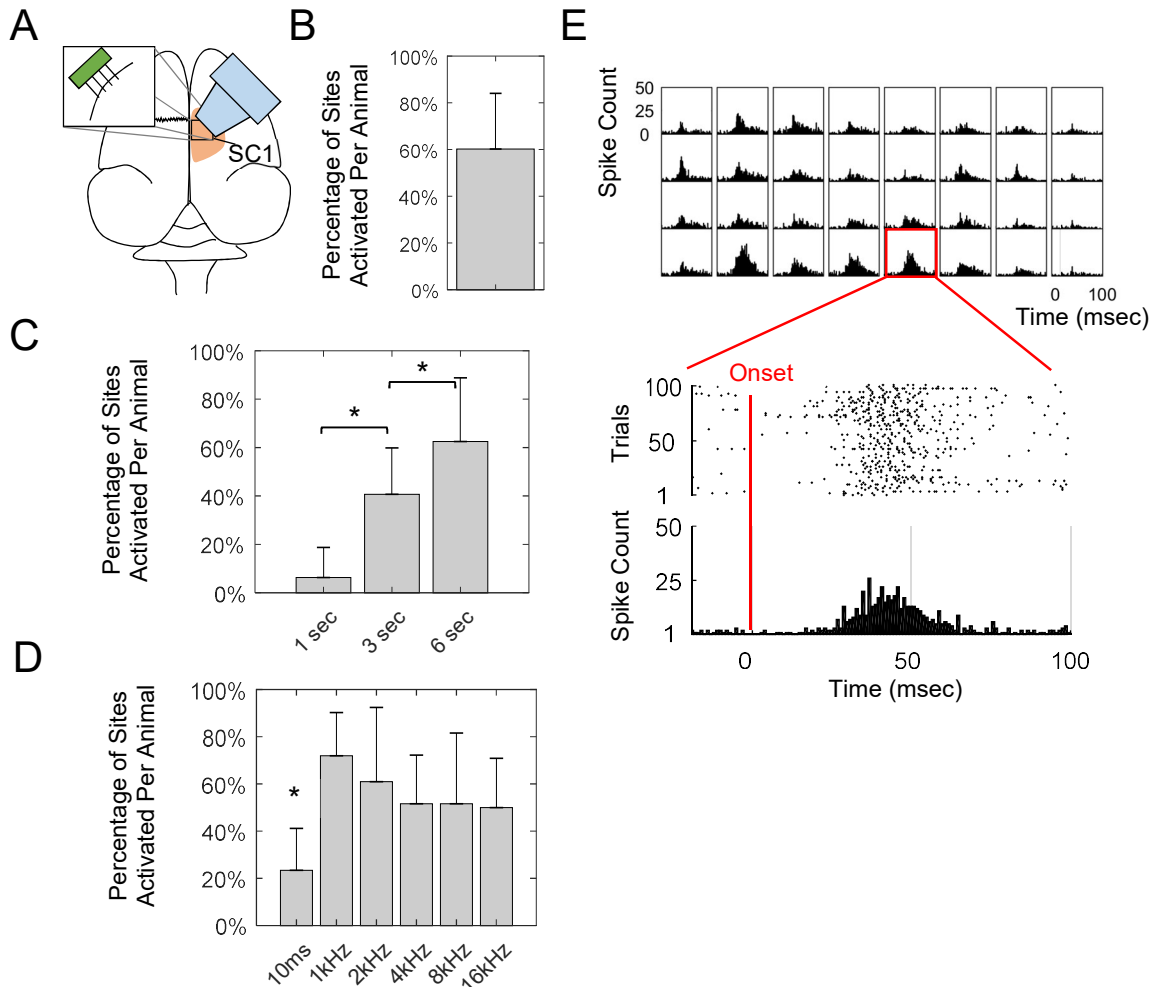

164 **Figure 5. US stimulation of SC1 with different US paradigms.** A 32-site electrode arrays were inserted  
 165 into the right SC1 of anesthetized guinea pigs. The US transducer was placed over SC1 coupled to the brain  
 166 with agar. B On average, 60.3% of SC1 recording sites were activated per animal (n=7) with US stimulation  
 167 (200 kPa, 1 kHz PRF, 0.5 msec PD, 20 pulses, 6 sec TD). C The percentage of SC1 sites activated per  
 168 animal (n=4) increased (two-tailed, unequal variance, ranked t-test;  $*P < 0.05$ ) as trial duration increased,  
 169 reaching 62.5% of sites with a 6 sec TD in this cohort of animals. D PRF also affected the percentage of  
 170 sites activated, in which repeated US pulse paradigms with different PRFs activated more sites than a single  
 171 10 msec pulse US stimulus (two-tailed, unequal variance, ranked t-test;  $*P < 0.05$ ). Lower PRFs appeared  
 172 to activate more sites. E A typical example of SC1 activation across a 32-site electrode array in response  
 173 to US stimulation (200 kPa, 1 kHz PRF, 0.5 msec PD, 20 pulses, 6 sec TD). One site example is magnified  
 174 for better visibility, showing a PSTH and a raster spike plot (i.e., dots corresponding the time occurrence  
 175 of each spike for each trial of US stimulation). Time is relative to stimulus onset. Detailed US paradigms  
 176 used in C and D can be found in Table S3. Data are represented as mean  $\pm$  SD.

177 To investigate US-induced activation effects similar to what was explored in previous studies (Lee  
178 et al., 2015, 2016; Tufail et al., 2010), we specifically tested US paradigms with different TDs of 1, 3, and  
179 6 sec and PRFs of 1, 2, 4, 8, and 16 kHz (in addition to a single pulse), while keeping other parameters  
180 unchanged. With a shorter TD of 1 sec, US only elicited  $12.5 \pm 6.3\%$  of activated sites, which was  
181 significantly lower ( $P < 0.05$ ) than  $40.6 \pm 19.3\%$  for 3 sec TD and  $62.5 \pm 26.3\%$  for 6 sec TD across four  
182 animals (Figure 5C). This finding is consistent with previous US studies stimulating the somatosensory,  
183 motor and visual cortices in which longer TDs caused greater activation (Lee et al., 2015, 2016; Tufail et  
184 al., 2010). For US stimulation with different PRFs (1, 2, 4, 8 and 16 kHz), single pulse stimulation (10 msec  
185 PD, 1 pulse, 6 sec TD) elicited a significantly lower percentage of activated sites across four animals ( $P <$   
186  $0.05$ ;  $23.4 \pm 17.8\%$  versus  $71.9 \pm 18.4\%$ ,  $60.9 \pm 31.5\%$ ,  $51.6 \pm 20.7\%$ ,  $51.57 \pm 29.7\%$ , and  $50.0 \pm 20.9\%$ ,  
187 respectively; Figure 5D), indicating that single pulse stimulation is not as effective in eliciting SC1 activity  
188 as repeated pulse patterns with varying PRFs. Although not significant ( $P > 0.05$ ), there appears to be a  
189 trend of greater activation with lower PRFs down to 1 kHz, which may explain why previous US studies  
190 stimulated the cortex using low PRFs such as 0.5 and 1.5 kHz, rather than trying single pulse US (Lee et  
191 al., 2015, 2016; Tufail et al., 2010).

192 Since we have shown that US-evoked A1 activity was elicited through an ascending auditory  
193 pathway originating at the peripheral or cochlear level and that US stimulation of different head or brain  
194 locations elicited similar responses in A1, we also questioned whether similar unexpected results would be  
195 observed for SC1. In the next section, we present data on the effects of eliminating cochlear function on  
196 US-induced SC1 activity. Here, we investigated the effects of US stimulation of a different cortical region,  
197 particularly visual cortex, on the neural response patterns elicited in SC1 (Figure 6A). Similar to what we  
198 observed for US-induced activity in A1, we were still able to elicit strong SC1 activation while stimulating  
199 a distant location with US, even though the focal zone in visual cortex was approximately 10 mm away  
200 from the SC1 recording sites. Thus, it is unlikely that US stimulation was directly activating SC1 since the  
201 target zone was far from SC1 (see Figure S1 for US energy field profile). The onset latency of neural activity  
202 was generally greater than 20 msec (Figure 6D,E), which is longer than would be expected for direct  
203 activation of cortical neurons with US. Surprisingly, the onset latency of neural activation when stimulating  
204 directly over SC1 versus visual cortex was not noticeably different (Figure 5E versus Figure 6D,E) and  
205 these longer ranges of latencies are consistent with those published in previous studies for US-induced  
206 activation of motor cortex (Tufail et al., 2010, 2011).

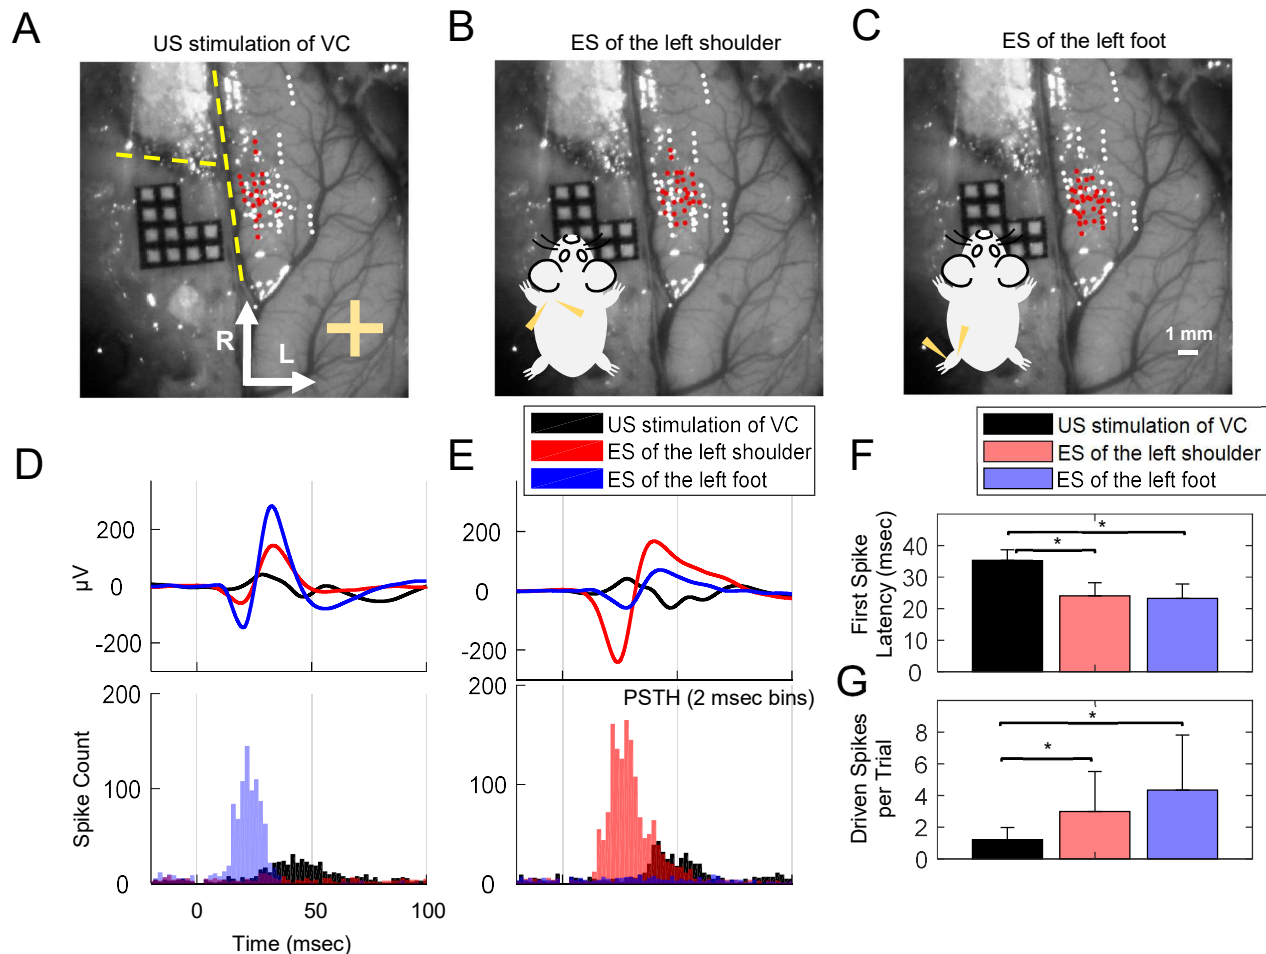

207 **Figure 6. Activation of SCI with US stimulation of visual cortex.** **A-C** Locations of recording electrodes  
 208 in SC1 that exhibited activity (red dots; white dots exhibited no activity) in response to US stimulation (400  
 209 kPa, 1 kHz PRF, 2.5 msec PD, 20 pulses, 6 sec TD) of the exposed visual cortex (**A**; plus sign is location  
 210 of visual cortex, VC), electrical stimulation (ES) of the left shoulder (LS; **B**), and ES of the left foot (LF;  
 211 **C**). Yellow dotted lines indicate the locations of the midline and the Bregma suture line. Red dots represent  
 212 locations where at least 50% of active recording sites along an inserted electrode shank were activated. ES  
 213 was presented in bipolar mode with two subcutaneous needle electrodes with a single, biphasic, cathodic-  
 214 leading pulse (205  $\mu$ s/phase, levels of 2.82 mA). US transducer was coupled to VC with agar. Data is pooled  
 215 across 4 animals and 576 recording sites, where 225 (39.1%), 221 (38.4%), and 300 (52.1%) sites were  
 216 activated by US stimulation of VC, ES of the LS, and ES of the LF, respectively. Out of the 225 sites  
 217 responding to US stimulation of VC, 105 (46.7%) and 136 (60.4%) sites overlapped with the sites  
 218 responding to ES of the LS and ES of the LF, respectively. **D-E** Examples of local field potentials (LFPs)  
 219 and PSTHs in response to US stimulation of VC (black), ES of the LS (red), and ES of the LF blue). For **D**,  
 220 ES of the LF elicited the most spikes and largest LFPs, while ES of the LS elicited the most spikes and  
 221 largest LFPs in **E**. **F** On average, first spike latencies were much longer (two-tailed, unequal variance,

222 ranked t-test;  $*P < 0.05$ ) in SC1 for US stimulation of VC ( $35.29 \pm 3.39$  msec) than for ES of the LS ( $24.07$   
223  $\pm 4.22$  msec) and ES of the LF ( $23.31 \pm 4.48$  msec). **G** On average, driven spike counts were also lower  
224 (two-tailed, unequal variance, ranked t-test;  $*P < 0.05$ ) for US stimulation of VC ( $1.23 \pm 0.76$  spikes per  
225 trial) compared to ES of the LS ( $2.99 \pm 2.53$  spikes per trial) and ES of the LF ( $4.35 \pm 3.48$  spikes per trial).  
226 Data are represented as mean  $\pm$  SD.

227

228 To better interpret the extent and delay of activation caused in SC1 in response to US of visual  
229 cortex, we compared the activity to what is elicited when electrically stimulating a somatosensory pathway,  
230 such as through electrical stimulation of a body region. We electrically stimulated the left shoulder or left  
231 foot and recorded neural activity across multiple locations in the contralateral (right) SC1 (Figure 6B,C).  
232 US stimulation targeted at the visual cortex still caused activation across a spatially broad region of SC1  
233 (Figure 6A), but tended to elicit weaker and longer latency responses than direct electrical stimulation of  
234 the somatosensory pathway (Figure 6D-G). Combined with the activation latencies observed in Figure 5,  
235 these data indicate that US was unlikely causing direct activation of the cortex and the neural activation  
236 mechanism was mostly insensitive to location of stimulation on the head, which is consistent with the  
237 findings shown in Figure 2.

### 238 **Removing a Cochlear Fluid Pathway Eliminates Auditory and Somatosensory Activity Induced by** 239 **Ultrasound Brain Stimulation**

240 Since the US-induced activity in A1 or SC1 appeared to be insensitive to location of stimulation across the  
241 head and was not altered substantially if US was applied to the skull or to soft tissue such as the brain  
242 surface or eyeball, we hypothesized that the mechanism of activation occurs through a fluid pathway by  
243 vibrating the CSF in the head (Figure 7A). The CSF in the brain is continuous with the fluid in the cochlea  
244 through the cochlear aqueducts (i.e., fluid channels between the head and cochlea; Gopen et al., 1997;  
245 Sohmer and Freeman, 2004; Sohmer et al., 2000). Therefore, vibrations of the CSF in the head or brain,  
246 such as through US stimulation, could induce vibrations in the cochlear fluids. Cochlear vibrations would  
247 then activate the hair cells along the cochlea that then innervate the auditory nerve fibers to the ascending  
248 auditory pathway in the brain (Moore et al., 2010; Yost, 2000). Activation of different auditory nuclei can  
249 lead to activation of non-auditory regions, such as SC1, through cross-modal projections consistent with  
250 the range of delays observed in Figures 5 and 6.

251 To confirm our hypothesis, we developed a method for removing the fluids from the cochlea using  
252 a syringe inserted through the round window membrane (Figure 7C), as further described in the Methods.  
253 Figure 7B,D (also Figure S2) shows that extensive US-induced activity is possible in A1 and SC1, but

254 disappears after removal of the cochlear fluids, confirming our hypothesis that the mechanism of US  
255 activation requires a cochlear fluid pathway. Inspired by a previous fluid conductive hearing study  
256 connecting the CSF of two animals through a water tube (Sohmer and Freeman, 2004), we designed a  
257 similar two-animal setup (Figure 7E) in which US was applied to a dead animal (green) and neural activity  
258 was recorded from A1 or SC1 of a live animal (grey). The right skull of the live animal was opened to  
259 expose the brain and covered with an agar layer. A fluid channel made of US gel connected the brain of the  
260 live animal to the skull of the dead animal. US was applied to the right skull of the dead animal. US  
261 stimulation of the dead animal elicited activity in A1 and SC1. Consistent with a fluid mechanism, the US-  
262 induced activity disappeared once the gel channel was broken (Figure 7F,G). To confirm that a fluid  
263 mechanism occurred within the brain, and not only through the gel channel from the dead animal, we  
264 performed another control experiment in which we directly connected the exposed brains of both animals,  
265 as shown in Figure 7H, and stimulated a different part of the exposed brain in the dead animal that was not  
266 in contact with the gel channel, thereby requiring conduction through the brain. Figure 7I,J shows that US  
267 can vibrate or travel through the brain of the dead animal to elicit neural activation in the live animal via a  
268 gel channel, and this activity disappears once the gel channel is broken. We used a dead animal for US  
269 stimulation to eliminate any conductive activation effects through the gel channel that may occur from US  
270 activity elicited in a live animal. Overall, these control experiments shown in Figure 7 confirm a fluid  
271 mechanism through the brain and cochlea for US-induced activation of the brain.

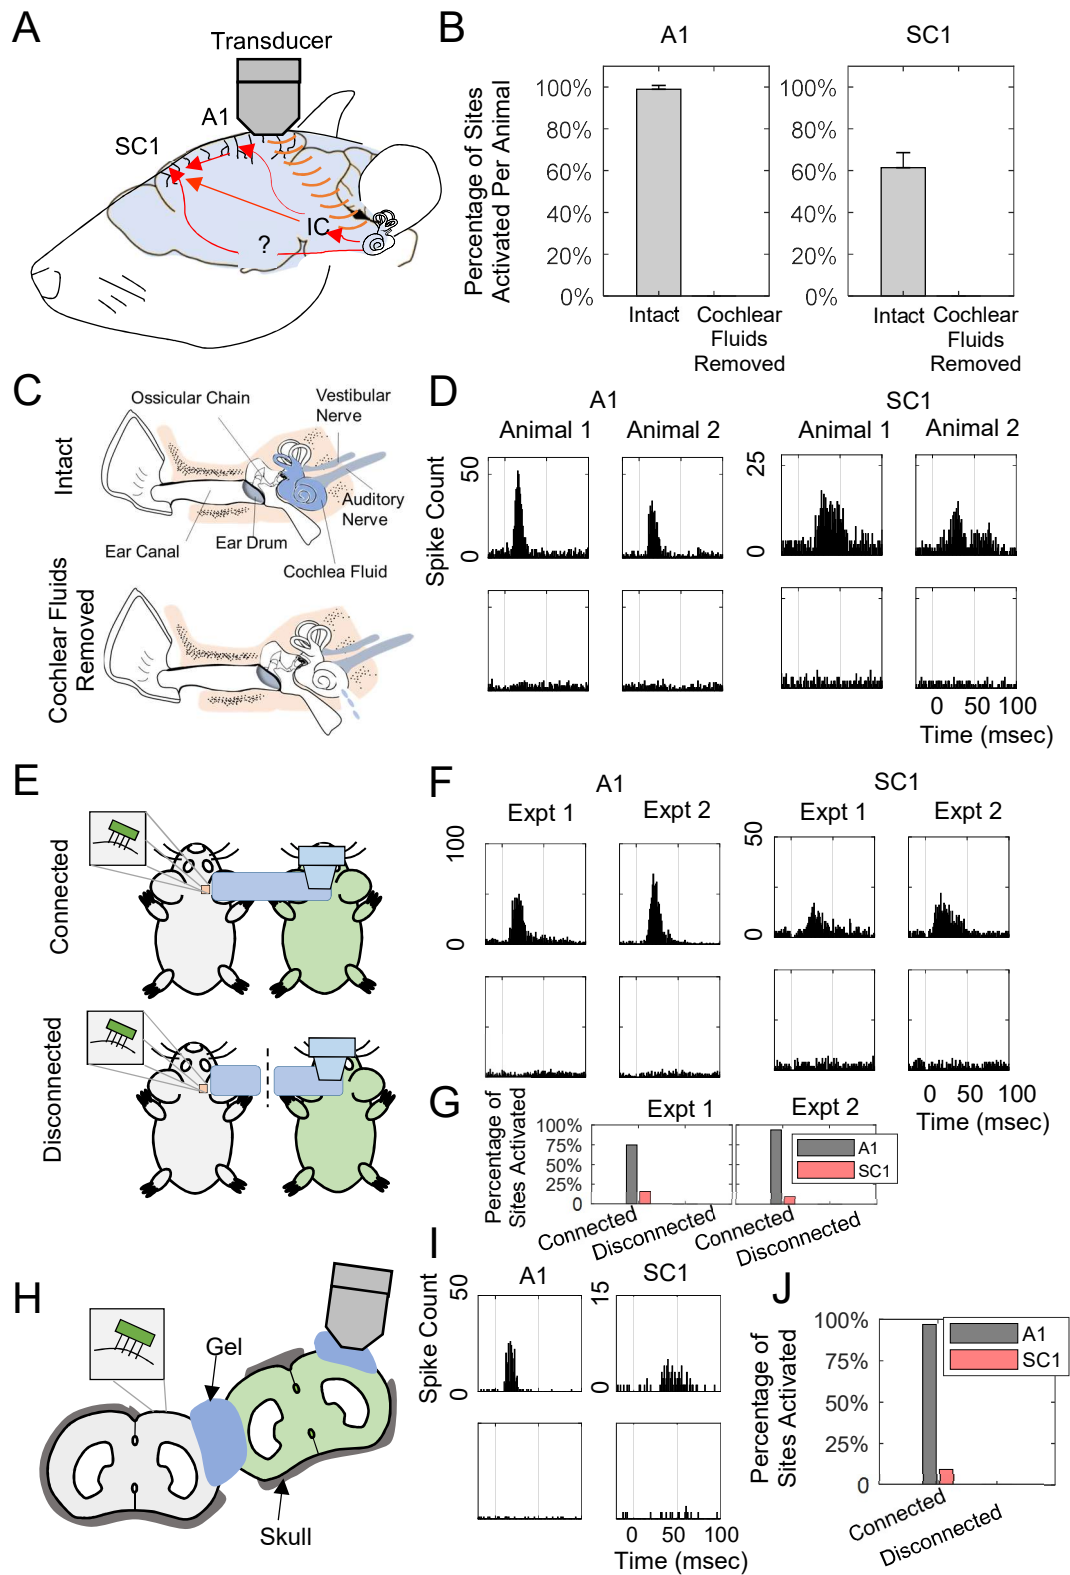

272 **Figure 7. Removing bilateral cochlear fluids eliminates US-induced auditory or somatosensory activity.**  
 273 A Illustration of the cochlear fluid pathway. US may be vibrating cerebrospinal fluids (CSF) that then  
 274 vibrates cochlear fluids (via cochlear aqueducts; i.e., CSF and cochlear fluids are part of a continuous fluid

275 medium) to induce activity along the ascending auditory pathway, which also has multimodal projections  
276 to somatosensory nuclei. **B** The percentages of A1 and SC1 sites activated by US stimulation before  
277 removal of cochlear fluids per animal were  $99.0 \pm 1.8\%$  and  $61.5\% \pm 7.2\%$ , respectively. In both cases, all  
278 activity was eliminated after fluids were removed in all animals ( $n=3$ ). **C-D** The illustration shows the  
279 peripheral auditory system before (upper plots in **C**) and after removal of the cochlear fluids (lower plots  
280 in **C**). In two different experiments, A1 activity elicited by US stimulation of the exposed A1 (50 kPa, 10  
281 msec PD, 500 msec TD) is shown in **D** (upper PSTHs), in which all activity was eliminated after cochlear  
282 fluids were removed (lower PSTHs). Similar findings are shown for SC1 activity in response to US  
283 stimulation of exposed SC1 (200 kPa, 1 kHz PRF, 0.5 msec PD, 20 pulses, 6 sec TD). **E-F** The illustration  
284 shows how US can indirectly activate the A1 (100 kPa, 10 msec PD, 500 msec TD) and SC1 (400 kPa, 1  
285 kHz PRF, 0.5 msec PD, 20 pulses, 6 sec TD) of one animal (grey) by transcranially stimulating the brain  
286 of another animal (green). A fluid channel made of US gel connects the exposed cortex of grey animals and  
287 the skull of the green animal (upper) to enable this animal-to-animal activation, as shown in the upper plots  
288 of **F**. Breaking this gel coupling (dotted line), eliminates the animal-to-animal activation (lower plots in **F**),  
289 further confirming a fluid/gel mechanism of activation of the brain with US stimulation. Data from two  
290 experiments are shown. **G** Bar plots illustrate that A1 and SC1 sites activated in grey animal (upper plots  
291 in **E**) were 75.0% and 15.6% in experiment #1, and 93.7% and 10.0% in experiment #2, which were  
292 eliminated after breaking of the gel channel connecting two animals (lower plots in **E**). **H-I** The illustration  
293 shows how the gel connects the exposed brain of the live animal (grey) and the left exposed brain of the  
294 dead animal (green). US stimulation of the right exposed brain of the green animal activates the A1 (200  
295 kPa, 10 msec PD, 500 msec TD) and SC1 (400 kPa, 1 kHz PRF, 0.5 msec PD, 20 pulses, 6 sec TD) of the  
296 grey animal (upper plots in **I**), which can be eliminated by breaking the gel channel connecting the two  
297 brains (lower plots in **I**). **J** Bar plots illustrate that A1 and SC1 sites activated in grey animal were 96.9%  
298 and 9.38% when connected with green animal through gel, which reduced to 0% after breaking the gel  
299 channel. Data are represented as mean  $\pm$  SD.

300

## 301 **Discussion**

302 Our study revealed that US is able to activate A1 with spatial-peak pulse-average acoustic intensities ( $I_{SPPA}$ )  
303 as low as  $20 \text{ mW/cm}^2$  ( $\sim 25 \text{ kPa}$  for the 0.22 MHz transducer), which are lower than what has been  
304 previously published for brain activation (Bystritsky and Korb, 2015; Bystritsky et al., 2011; Tufail et al.,  
305 2010). However, this US-evoked A1 activity is through a non-direct cochlear fluid pathway rather than  
306 direct activation of A1 neurons. This finding is supported by multiple pieces of evidence. First, US  
307 stimulation of other non-auditory regions far from A1 (e.g., exposed SC1, contralateral skull or eyeball)



308 caused similar activation of A1 as that from directly targeting A1. Second, US stimulation of A1 elicited  
309 strong activity in ICC, but the onset latencies of activity in ICC were significantly shorter than those  
310 recorded in A1 ( $P \ll 0.001$ ), suggesting ICC activation was not elicited through the descending corticofugal  
311 projections from A1. In addition, the average onset latency of US-induced activity in A1 was approximately  
312 14 msec, which is similar to the latency required for acoustic stimuli to vibrate the cochlea and activate the  
313 auditory nerve up to the brainstem, ICC, thalamus, and A1 through the ascending auditory pathway in  
314 guinea pigs ( $14.4 \pm 4.4$  msec; Wallace et al., 2000). Finally, the US-evoked A1 activity could be eliminated  
315 by either transecting the auditory nerves or removing the cochlear fluids for both ears.

316 We confirmed that US can activate SC1 with a wide range of parameters with intensities as low as  
317  $80 \text{ mW/cm}^2 I_{\text{SPPA}}$  ( $\sim 50 \text{ kPa}$  for the 0.22 MHz transducer), which is on the same order of magnitude as  
318 previous studies (Lee et al., 2015; Mehić et al., 2014; Tufail et al., 2010; Ye et al., 2016; Yoo et al., 2011).  
319 US stimulation of non-SC1 regions such as the visual cortex was also able to activate SC1. Similar to the  
320 findings for US-evoked A1 activity, we found that US-evoked SC1 activity was eliminated by removing  
321 cochlear fluids in both ears, suggesting US does not directly activate SC1 neurons but instead causes SC1  
322 activation through a vibratory cochlear pathway that likely activates non-auditory neurons via cross-modal  
323 projections.

324 Numerous studies have shown extensive connections and interactions among different brain  
325 circuits (e.g., auditory, somatosensory, motor, visual, and high-level cognitive nuclei (Gruters and Groh,  
326 2012; Ramachandran and Altschuler, 2009; Schofield et al., 2011; Sigrist et al., 2013; Wang et al., 2008))  
327 to support this US-induced cross-modal mechanism. As to how much this US-induced cochlear mechanism  
328 contributed to the activation effects observed in previous US stimulation studies needs further investigation  
329 (e.g., Mehić et al., 2014; Tufail et al., 2010, 2011; Ye et al., 2016; Yoo et al., 2011).

330 One unexpected finding from our study is the large extent of activation across the auditory system  
331 that is possible with US stimulation at low intensities. For example, strong activation of A1 is possible at a  
332 pressure of  $100 \text{ kPa}$  ( $330 \text{ mW/cm}^2 I_{\text{SPPA}}$ ) for a 0.1 msec PD and 500 msec TD (e.g., similar activity to a 70  
333 dB SPL broadband noise). Previous US studies have used intensities on the order of  $1 \text{ W/cm}^2 I_{\text{SPPA}}$  for their  
334 neural activation or motor movement experiments (Mehić et al., 2014; Tufail et al., 2010; Ye et al., 2016;  
335 Yoo et al., 2011), which would be expected to elicit a very loud sound in the animals. In lightly anesthetized  
336 animals, it is possible that such loud US-induced sounds could elicit an auditory startle response and  
337 movements of limbs, whiskers or the tail (Geyer and Swerdlow, 2001; Grimsley et al., 2015; Turner et al.,  
338 2006). Previous studies have shown that US can induce motor movements, but usually in lightly  
339 anesthetized animals (Mehić et al., 2014; Tufail et al., 2010, 2011; Ye et al., 2016). Our results combined  
340 with those presented in the companion paper by Sato et al. raise the question as to whether the US-induced

341 movements demonstrated in previous studies were caused by loud sounds through a vibratory cochlear  
342 effect induced from US stimulation (Tomokazu Sato et al., 2017). It is interesting that some studies found  
343 that US positioned on caudal locations of the head, closer to where the cochleas are located, achieved  
344 stronger and more reliable motor movements than US positioned over the motor cortices (Mehić et al., 2014;  
345 Ye et al., 2016). It is also interesting that the success rate for eliciting motor responses is quite low for  
346 different locations (usually less than 50%). Animals can experience variable responses and adaptation to  
347 the startle response in which it is more difficult to elicit startle reflexes over repeated or regular  
348 presentations (Davis, 1970; Glowa and Hansen, 1994; Grimsley et al., 2015), which may contribute to the  
349 high failure percentages of motor movements reported in previous US stimulation studies.

350         Although we find that removal of bilateral cochlear fluids eliminates US-evoked A1 and SC1  
351 activity in guinea pigs, it should not be assumed that the same is true for other animal species. At least  
352 based on the consistent findings in mice in the companion paper by Sato et al., it appears that the US-  
353 induced activation of the brain via a cochlear pathway is valid for rodents (Tomokazu Sato et al., 2017).  
354 However, further studies are needed to assess the confounding effects of US-induced cochlear activation in  
355 other species with larger head sizes, including humans. Previous studies in humans have shown that US  
356 stimulation applied to the head with low frequencies (27-33 kHz) can elicit sound perception via a skull  
357 vibration mechanism (Ito and Nakagawa, 2010; Nakagawa et al., 2006), but the auditory activation effects  
358 for higher US frequencies used in neuromodulation studies still need to be investigated. There may also  
359 exist other US parameters that can achieve direct brain activation as well as modulation of neurons that  
360 were not tested in our study. There is evidence that US can directly activate neurons in *in vitro* experiments  
361 using brain slice cultures and modulate ion channels in oocytes (Kubanek et al., 2016; Tyler et al., 2008),  
362 which cannot be explained by a vibratory cochlear mechanism. There is also a recent study in humans  
363 demonstrating that US stimulation of the somatosensory cortex can elicit tactile sensations in the hand (Lee  
364 et al., 2015), which cannot be explained by a vibratory cochlear mechanism. Therefore, further studies are  
365 still needed to fully explore the parameter space to characterize the type and extent of US activation and  
366 modulation that is possible within the brain across species. Our findings reveal the critical need in these  
367 future studies to account for or eliminate confounding effects that can lead to artificial or indirect neural  
368 activation when applying US stimulation to the head. US-induced cochlear vibration is one confounding  
369 effect. Other confounding effects may include US-induced activation of skin receptors on the head or  
370 vibration of the skull or eyeballs, which in turn could activate various sensory and motor pathways that  
371 contribute to the overall activity of the brain.

## Acknowledgements

We would like to thank Daniel Zachs and Pooja Mehta for their help with the experimental setup and data interpretation. We also would like to thank Alyona Haritonova for contributions with ultrasound setup and technical discussions. This research was supported by SONIC Lab Discretionary Funds and a MnDRIVE Brain Conditions Innovations Grant led by Hubert Lim, Jamu Alford and Wynn Legon.

## Author Contributions

Conceptualization, H.H.L., H.G., M.H., J.K.A., S.J.O., and W.L.; Methodology, H.G., H.H.L., M.H., S.J.O., C.D.G., J.K.A., Y.K., and T.L.; Software and Formal Analysis, H.G., M.H., S.J.O., and H.H.L.; Investigation, H.G., M.H., S.J.O., T.L., C.D.G., and Y.K.; Writing – Original Draft, H.G., H.H.L., C.D.G., and M.H.; Writing – Review & Editing, H.G., H.H.L., S.J.O., C.D.G., M.H., J.K.A., W.L., T.L., Y.K.; Visualization H.G., M.H., and S.J.O.; Supervision, H.H.L., J.K.A., S.J.O., and W.L.; Funding Acquisition, H.H.L., J.K.A., and W.L.

## Declaration of Interests

Sarah J. Offutt and Yohan Kim are employees of Medtronic and own stock in the company. Jamu K. Alford was an employee and shareholder at Medtronic during the majority of this work.

## References

- Aitkin, L.M., Kenyon, C.E., and Philpott, P. (1981). The representation of the auditory and somatosensory systems in the external nucleus of the cat inferior colliculus. *J. Comp. Neurol.* *196*, 25–40.
- Brunoni, A.R., Amadera, J., Berbel, B., Volz, M.S., Rizzerio, B.G., and Fregni, F. (2011). A systematic review on reporting and assessment of adverse effects associated with transcranial direct current stimulation. *Int. J. Neuropsychopharmacol.* *14*, 1133–1145.
- Bystritsky, A., and Korb, A.S. (2015). A Review of Low-Intensity Transcranial Focused Ultrasound for Clinical Applications. *Curr. Behav. Neurosci. Rep.* *2*, 60–66.
- Bystritsky, A., Korb, A.S., Douglas, P.K., Cohen, M.S., Melega, W.P., Mulgaonkar, A.P., DeSalles, A., Min, B.-K., and Yoo, S.-S. (2011). A review of low-intensity focused ultrasound pulsation. *Brain Stimulat.* *4*, 125–136.
- Clemo, H.R., Sharma, G., Allman, B., and Meredith, A. (2007). Auditory projections to visual cortex: synaptic basis for multisensory processing in ‘unimodal’ visual neurons. *J. Vis.* *7*, 864–864.
- Davis, M. (1970). Effects of interstimulus interval length and variability on startle-response habituation in the rat. *J. Comp. Physiol. Psychol.* *72*, 177–192.

Deng, Z.-D., Lisanby, S.H., and Peterchev, A.V. (2013). Electric field depth–focality tradeoff in transcranial magnetic stimulation: Simulation comparison of 50 coil designs. *Brain Stimulat.* *6*, 1–13.

Foxe, J.J., Morocz, I.A., Murray, M.M., Higgins, B.A., Javitt, D.C., and Schroeder, C.E. (2000). Multisensory auditory-somatosensory interactions in early cortical processing revealed by high-density electrical mapping. *Brain Res. Cogn. Brain Res.* *10*, 77–83.

Fry, F.J., Ades, H.W., and Fry, W.J. (1958). Production of reversible changes in the central nervous system by ultrasound. *Science* *127*, 83–84.

Geyer, M.A., and Swerdlow, N.R. (2001). Measurement of startle response, prepulse inhibition, and habituation. *Curr. Protoc. Neurosci. Chapter 8*, Unit 8.7.

Glowa, J.R., and Hansen, C.T. (1994). Differences in response to an acoustic startle stimulus among forty-six rat strains. *Behav. Genet.* *24*, 79–84.

Gopen, Q., Rosowski, J.J., and Merchant, S.N. (1997). Anatomy of the normal human cochlear aqueduct with functional implications. *Hear. Res.* *107*, 9–22.

Grimsley, C.A., Longenecker, R.J., Rosen, M.J., Young, J.W., Grimsley, J.M., and Galazyuk, A.V. (2015). An improved approach to separating startle data from noise. *J. Neurosci. Methods* *253*, 206–217.

Gruters, K.G., and Groh, J.M. (2012). Sounds and beyond: multisensory and other non-auditory signals in the inferior colliculus. *Front. Neural Circuits* *6*, 96.

Hallett, M. (2000). Transcranial magnetic stimulation and the human brain. *Nature* *406*, 147–150.

Huang, C.L., and Winer, J.A. (2000). Auditory thalamocortical projections in the cat: laminar and areal patterns of input. *J. Comp. Neurol.* *427*, 302–331.

Ito, K., and Nakagawa, S. (2010). Perception Mechanisms of Bone-Conducted Ultrasound Assessed by Acoustic Characteristics in the External Auditory Meatus. *Jpn. J. Appl. Phys.* *49*, 07HF31.

Johnson, M.D., Lim, H.H., Netoff, T.I., Connolly, A.T., Johnson, N., Roy, A., Holt, A., Lim, K.O., Carey, J.R., Vitek, J.L., et al. (2013). Neuromodulation for Brain Disorders: Challenges and Opportunities. *IEEE Trans. Biomed. Eng.* *60*, 610–624.

King, R.L., Brown, J.R., and Pauly, K.B. (2014). Localization of Ultrasound-Induced In Vivo Neurostimulation in the Mouse Model. *Ultrasound Med. Biol.* *40*, 1512–1522.

Kubanek, J., Shi, J., Marsh, J., Chen, D., Deng, C., and Cui, J. (2016). Ultrasound modulates ion channel currents. *Sci. Rep.* *6*.

Lee, W., Kim, H., Jung, Y., Song, I.-U., Chung, Y.A., and Yoo, S.-S. (2015). Image-Guided Transcranial Focused Ultrasound Stimulates Human Primary Somatosensory Cortex. *Sci. Rep.* *5*, 8743.

Lee, W., Kim, H.-C., Jung, Y., Chung, Y.A., Song, I.-U., Lee, J.-H., and Yoo, S.-S. (2016). Transcranial focused ultrasound stimulation of human primary visual cortex. *Sci. Rep.* *6*, srep34026.

Legon, W., Sato, T.F., Opitz, A., Mueller, J., Barbour, A., Williams, A., and Tyler, W.J. (2014). Transcranial focused ultrasound modulates the activity of primary somatosensory cortex in humans. *Nat. Neurosci.* *17*, 322–329.

Lim, H.H., and Anderson, D.J. (2006). Auditory Cortical Responses to Electrical Stimulation of the Inferior Colliculus: Implications for an Auditory Midbrain Implant. *J. Neurophysiol.* *96*, 975–988.

Lim, H.H., and Anderson, D.J. (2007). Spatially distinct functional output regions within the central nucleus of the inferior colliculus: implications for an auditory midbrain implant. *J. Neurosci. Off. J. Soc. Neurosci.* *27*, 8733–8743.

Markovitz, C.D., Tang, T.T., and Lim, H.H. (2013). Tonal and localized pathways from primary auditory cortex to the central nucleus of the inferior colliculus. *Front. Neural Circuits* *7*.

Markovitz, C.D., Smith, B.T., Gloeckner, C.D., and Lim, H.H. (2015a). Investigating a new neuromodulation treatment for brain disorders using synchronized activation of multimodal pathways. *Sci. Rep.* *5*, 9462.

Markovitz, C.D., Hogan, P.S., Wesen, K.A., and Lim, H.H. (2015b). Pairing broadband noise with cortical stimulation induces extensive suppression of ascending sensory activity. *J. Neural Eng.* *12*, 026006.

Mehić, E., Xu, J.M., Caler, C.J., Coulson, N.K., Moritz, C.T., and Mourad, P.D. (2014). Increased Anatomical Specificity of Neuromodulation via Modulated Focused Ultrasound. *PLOS ONE* *9*, e86939.

Middlebrooks, J.C. (2008). Auditory cortex phase locking to amplitude-modulated cochlear implant pulse trains. *J. Neurophysiol.* *100*, 76–91.

Moore, D.R., Fuchs, P.A., Rees, A., Palmer, A., and Plack, C.J. (2010). *The Oxford Handbook of Auditory Science: The Auditory Brain* (OUP Oxford).

Murray, M.M., and Wallace, M.T. (2011). *The Neural Bases of Multisensory Processes* (CRC Press).

Nakagawa, S., Okamoto, Y., and Fujisaka, Y. (2006). Development of a Bone-conducted Ultrasonic Hearing Aid for the Profoundly Sensorineural Deaf. *生体医工学* *44*, 184–189.

Nitsche, M.A., Cohen, L.G., Wassermann, E.M., Priori, A., Lang, N., Antal, A., Paulus, W., Hummel, F., Boggio, P.S., Fregni, F., et al. (2008). Transcranial direct current stimulation: State of the art 2008. *Brain Stimulat.* *1*, 206–223.

Offutt, S.J., Ryan, K.J., Konop, A.E., and Lim, H.H. (2014). Suppression and facilitation of auditory neurons through coordinated acoustic and midbrain stimulation: investigating a deep brain stimulator for tinnitus. *J. Neural Eng.* *11*, 066001.

Perlmutter, J.S., and Mink, J.W. (2006). Deep brain stimulation. *Annu Rev Neurosci* *29*, 229–257.

Ramachandran, V.S., and Altschuler, E.L. (2009). The use of visual feedback, in particular mirror visual feedback, in restoring brain function. *Brain* *132*, 1693–1710.

Rapisarda, C., Palmeri, A., Aicardi, G., and Sapienza, S. (1990). Multiple Representations of the Body and Input-Output Relationships in the Agranular and Granular Cortex of the Chronic Awake Guinea Pig. *Somatosens. Mot. Res.* *7*, 289–314.

Ruxton, G.D. (2006). The unequal variance t-test is an underused alternative to Student's t-test and the Mann–Whitney U test. *Behav. Ecol.* *17*, 688–690.

Schofield, B.R., Motts, S.D., and Mellott, J.G. (2011). Cholinergic cells of the pontomesencephalic tegmentum: connections with auditory structures from cochlear nucleus to cortex. *Hear. Res.* *279*, 85–95.

Sigrist, R., Rauter, G., Riener, R., and Wolf, P. (2013). Augmented visual, auditory, haptic, and multimodal feedback in motor learning: a review. *Psychon. Bull. Rev.* *20*, 21–53.

Smith, P.H., and Populin, L.C. (2001). Fundamental differences between the thalamocortical recipient layers of the cat auditory and visual cortices. *J. Comp. Neurol.* *436*, 508–519.

Snyder, R.L., Bierer, J.A., and Middlebrooks, J.C. (2004). Topographic Spread of Inferior Colliculus Activation in Response to Acoustic and Intracochlear Electric Stimulation. *JARO J. Assoc. Res. Otolaryngol.* *5*, 305–322.

Sohmer, H., and Freeman, S. (2004). Further evidence for a fluid pathway during bone conduction auditory stimulation. *Hear. Res.* *193*, 105–110.

Sohmer, H., Freeman, S., Geal-Dor, M., Adelman, C., and Savion, I. (2000). Bone conduction experiments in humans—a fluid pathway from bone to ear. *Hear. Res.* *146*, 81–88.

Stein, B.E., and Stanford, T.R. (2008). Multisensory integration: current issues from the perspective of the single neuron. *Nat. Rev. Neurosci.* *9*, 255–266.

Straka, M.M., Hughes, R., Lee, P., and Lim, H.H. (2015). Descending and tonotopic projection patterns from the auditory cortex to the inferior colliculus. *Neuroscience* *300*, 325–337.

Tomokazu Sato, Mikhail G. Shapiro, and Doris Y. Tsao (2017). Ultrasonic Neuromodulation Causes Widespread Cortical Activation via an Indirect Auditory Mechanism. *Submitt. Neuron*.

Tufail, Y., Matyushov, A., Baldwin, N., Tauchmann, M.L., Georges, J., Yoshihiro, A., Tillery, S.I.H., and Tyler, W.J. (2010). Transcranial Pulsed Ultrasound Stimulates Intact Brain Circuits. *Neuron* *66*, 681–694.

Tufail, Y., Yoshihiro, A., Pati, S., Li, M.M., and Tyler, W.J. (2011). Ultrasonic neuromodulation by brain stimulation with transcranial ultrasound. *Nat. Protoc.* *6*, 1453–1470.

Turner, J.G., Brozoski, T.J., Bauer, C.A., Parrish, J.L., Myers, K., Hughes, L.F., and Caspary, D.M. (2006). Gap detection deficits in rats with tinnitus: a potential novel screening tool. *Behav. Neurosci.* *120*, 188–195.

Tyler, W.J., Tufail, Y., Finsterwald, M., Tauchmann, M.L., Olson, E.J., and Majestic, C. (2008). Remote Excitation of Neuronal Circuits Using Low-Intensity, Low-Frequency Ultrasound. *PLoS ONE* *3*, e3511.

Wallace, M.N., Rutkowski, R.G., and Palmer, A.R. (2000). Identification and localisation of auditory areas in guinea pig cortex. *Exp. Brain Res.* *132*, 445–456.

Wang, Y., Celebrini, S., Trotter, Y., and Barone, P. (2008). Visuo-auditory interactions in the primary visual cortex of the behaving monkey: Electrophysiological evidence. *BMC Neurosci.* *9*, 79.

Wattiez, N., Constans, C., Deffieux, T., Daye, P.M., Tanter, M., Aubry, J.-F., and Pouget, P. (2017). Transcranial ultrasonic stimulation modulates single-neuron discharge in macaques performing an antisaccade task. *Brain Stimulat.* *10*, 1024–1031.

Ye, P.P., Brown, J.R., and Pauly, K.B. (2016). Frequency Dependence of Ultrasound Neurostimulation in the Mouse Brain. *Ultrasound Med. Biol.* *42*, 1512–1530.

Yoo, S.-S., Bystritsky, A., Lee, J.-H., Zhang, Y., Fischer, K., Min, B.-K., McDannold, N.J., Pascual-Leone, A., and Jolesz, F.A. (2011). Focused ultrasound modulates region-specific brain activity. *NeuroImage* *56*, 1267–1275.

Yost, W.A. (2000). *Fundamentals of Hearing: An Introduction* (Academic Press).

## Methods

**Animal Surgical Preparations:** The animal surgical procedures are detailed in previous work (Markovitz et al., 2013; Offutt et al., 2014; Straka et al., 2015). Experiments were performed on thirty young Hartley guinea pigs (350–580 g; Elm Hill Breeding Labs, Chelmsford, MA, USA) in accordance with policies of the University of Minnesota Institutional Animal Care and Use Committee. Each animal was anesthetized with an intramuscular injection of a mixture of ketamine (40 mg/kg) and xylazine (10 mg/kg) with supplements every 45–60 min to maintain an areflexive state. Heart rate and blood oxygenation was continuously monitored using a pulse oximeter (Edan Instruments Inc., Shenzhen, China), and body temperature was maintained at  $38.0 \pm 0.5^\circ\text{C}$  using a heating blanket and rectal thermometer. Each animal was fixed in a stereotaxic frame (David Kopf Instruments, Tujunga, CA, USA), and a craniotomy was performed to expose the right auditory, visual and somatosensory cortices. Different configurations of 32-site electrode arrays (NeuroNexus Technologies, Ann Arbor, MI, USA) were inserted into the cortex and midbrain using hydraulic micro-manipulators (David Kopf Instruments, Tujunga, CA, USA). Example placements are shown in Figure 1A, 2C and 5A. After placement of the arrays, the brain was covered with agarose to reduce swelling, pulsations, and drying during recording sessions.

**Neural Recording and Stimulation:** Experiments were performed within a sound attenuating, electrically shielded room using custom software and TDT hardware (Tucker-Davis Technology, Alachua, FL, USA). The electrode array used for A1 and SC1 consisted of four 5 mm-long shanks separated by 500  $\mu\text{m}$  with eight iridium sites linearly spaced 200  $\mu\text{m}$  (center-to-center) along each shank. The electrode array used for

ICC in the auditory midbrain consisted of two 10 mm-long shanks separated by 500  $\mu\text{m}$  with 16 iridium sites linearly spaced at 100  $\mu\text{m}$ . The impedances were measured using niPOD (NeuroNexus Technologies, Ann Arbor, MI, USA) and ranged from 0.4-0.7  $\text{M}\Omega$  and 0.8-1.5  $\text{M}\Omega$  (at 1 kHz) for SC1/A1 and ICC probes, respectively. The A1 array was placed perpendicular to the cortical surface and inserted to a depth of approximately 1.6 mm such that the four shanks were arranged along the tonotopic gradient of A1. The ICC array was inserted 45° to the sagittal plane through the occipital cortex and into the ICC such that the sites spanned the tonotopic gradient of the ICC (Lim and Anderson, 2006; Snyder et al., 2004). Multi-unit neural data was recorded and sampled at a rate of 25 kHz, passed through analog DC-blocking and anti-aliasing filters up to 7.5 kHz, and digitally filtered between 0.3 and 3.0 kHz for the analysis of neural spikes; spikes were determined to be voltages exceeding 3.5 (or higher) times the standard deviation of the noise floor. All the PSTHs are plotted across 100 trials and binned at 1 msec, except for the PSTHs in Figure 6D,E which are binned at 2 msec for better visualization. All acoustic stimulation was presented to the animal's left ear canal via a speaker coupled to a custom-made hollow ear bar. The speaker-ear bar system was calibrated using a 0.25" condenser microphone (ACO Pacific, Belmont, CA, USA). For guiding placement of the electrode array into the somatosensory cortex, electrical stimulation of the foot (biphasic, cathodic-leading pulse, 205  $\mu\text{s}$ /phase, levels of 2.82 mA) with the stimulation ground placed in the foot was used. The input layer of A1 is layer III/IV in guinea pigs (Huang and Winer, 2000; Smith and Populin, 2001), which was identified by performing current source density (CSD) analysis as described in one previous study from our lab (Straka et al., 2015). The one-dimensional CSD approximation provides a consistent representation for the current sinks and sources associated with columnar synaptic activity in the guinea pig auditory cortex (Lim and Anderson, 2007; Middlebrooks, 2008). The main input layer of AC corresponded to the site with the shortest latency current sink (i.e., positive CSD peak). The layer II was identified as being two electrode sites ( $\sim 400 \mu\text{m}$ ) above the layer III/IV site.

**Verification of Probe Placement:** Pure tones (50 ms duration, 5 ms ramp/decay) of varying frequencies (0.6–38 kHz, 8 steps/octave) and levels (0–70 dB SPL in 10 dB steps) were randomly presented to the animal's left ear (4 trials/parameter), and acoustic-driven responses were recorded in A1 and the ICC to determine the functional location of each electrode site. A frequency response map was created for each recording site using driven spike rates (windowed 5–60 msec after tone onset for ICC sites and 5–20 msec for A1 sites) in which the spike rate was plotted on a color scale as a function of pure tone frequency (abscissa) and stimulus level (ordinate). From these frequency response maps, the best frequency for a given site was determined to be the frequency centroid at 10 dB above the visually determined neural threshold. For A1 placements, increasing best frequencies along the rostralateral to caudomedial axis and short response latencies of approximately 15 msec confirmed that the array was within A1. Array placement within the ICC was confirmed by observing frequency response maps that increased in best frequency with



increasing depth. In SC1 control experiments of US stimulation of visual cortex, the location of SC1 was confirmed by observing the evoked SC1 activity responding to electrical stimulation (biphasic, cathodic-leading pulse, 205  $\mu$ s/phase, levels of 2.82 mA) of different body regions (e.g., foot, shoulder) as is expected for the somatotopic map of SC1 (Rapisarda et al., 1990).

**Electrode Site Reconstructions:** In SC1 mapping experiments, site locations in SC1 were identified by imaging the exposed cortical surface with the inserted array shanks using a microscope mounted camera (OPMI 1 FR pro, Zeiss, Dublin, CA). Locations across animals were then normalized based on their relative distances from the middle suture line, bregma, and the lateral suture line, as successfully performed in previous studies from our lab (Markovitz et al., 2013, 2015b).

**Data Analysis:** Response latencies for ICC sites and A1 sites were calculated using the first spike latency method. The time between the stimulus and the first spike following the stimulus was determined for each trial, and these times were averaged across all trials to determine the latency of each recording site. Spike counts for SC1 sites in response to US stimulation of visual cortex, electrical stimulation of the left foot, and electrical stimulation of the left shoulder were measured over a manually selected window 5-20 msec after the beginning of the onset of the stimulation to avoid electrical artifacts. Statistical comparisons between groups were performed using a ranked unequal variance two-tailed t-test ( $P < 0.05$ ; Ruxton, 2006). The activated sites were determined by statistical testing if the evoked responses had higher spike rates than the spontaneous activity before the onset of stimulation (same window length as evoked responses) using a ranked unequal variance two-tailed t-test ( $P < 0.001$ ).

**US Transducer Parameters and Placement:** One US transducer at 220 kHz (Sonic Concepts, Bothell, WA) was used in this study, which was fitted with a 3D-printed focusing cone with a point diameter of 3 mm. This transducer was powered by a signal generator (Keysight Technologies 33512B, Santa Rosa, CA) amplified by a radio frequency amplifier (E&I 2200, Electronics & Innovation, Ltd., NY, USA). Through the signal generator, the primary channel was used to drive the US center frequency, and a secondary channel was used to modulate the center frequency signal into desired pulse envelopes. For A1 activation, the US transducer was placed over A1 and coupled directly to the brain via agarose gel. The A1 probe was placed such that electrical stimulation resulted in ICC activation, based on previous studies (Markovitz et al., 2015a). US paradigms (single pulse or 10 Hz-1.5 kHz PRF, 0.1-10 msec PD, 25 kPa-2 MPa pressure, 500 msec PD; Table S1) were tested in A1. For assessing SC1 activation, the probe was inserted into SC1 and the US transducer was placed over SC1 and coupled directly to the brain via agarose gel. US paradigms (single pulse or 1-16 kHz PRF, 0.31-10 msec PD, 50 kPa-1.6 MPa pressure, 1-6 sec PD; Table S3) were tested in SC1. In control experiments, the transducer was placed in several different locations, including directly on the brain with the skull and dura removed in A1, somatosensory cortex and visual cortex. For

targeting the visual cortex with US, the same 32-site electrode array used in SC1 experiments was implanted into the lateral and caudal region of the right brain to first identify the visual cortex. The location of the visual cortex was confirmed when neural responses were elicited to light stimulation using white light-emitting diodes flashing at 2 Hz applied to the left eye.

**Ultrasound Calibration:** Transducer outputs were characterized in a tank filled with deionized, degassed water under free-field conditions (i.e., without the presence of reflective obstacles). Each transducer/coupling cone unit was held perpendicularly above the water tank such that only the tip of the cone was submerged. A high sensitivity hydrophone (HNR 0500 ONDA Corp, Sunnyvale, CA, USA), calibrated between 50 kHz to 20 MHz, was positioned directly underneath the cone tip to acquire pressure measurements. Ultrasound output calibration charts were obtained based on peak negative pressure amplitudes collected at 1 mm below the tip of the coupling cone. Ultrasound field mapping was performed using a 3D motorized positioning system (Velmex Inc., Bloomfield, NY, USA). Pressure field profiles (Figure S1) were constructed by referencing negative pressure amplitudes of sonication pulses collected at different spatial locations, which were normalized with respect to the highest spatial peak negative pressure measured at the intended focus of the transducer.

**Additional Surgical Preparations for Control Experiments:** For animals in which the auditory nerves were transected, additional surgical preparations were required. During the craniotomy, the skull was removed five millimeters rostral and caudal of the transverse cerebral fissure for the full width of the brain (i.e., as far lateral as possible before the skull descends ventrally). This step was performed prior to placing the ultrasound transducer or electrode arrays. After recordings were performed with the auditory nerves intact, the auditory nerves were cut using a fine needle which was inserted between the skull and the cortex at approximately 1-2 mm rostral of the transverse cerebral fissure and moved back and forth along the inner skull surface in a rostral-caudal direction to sever the auditory nerve. This step was performed on both sides of the head. For animals in which the cochlear fluids were removed, subcutaneous lidocaine was given to both ears and small incisions were made in the postauricular area to expose the skull overlying the bullas. The muscles around the incision were removed and a small hole was made to expose the bulla and provide access to the cochlea. A fine needle was inserted into the round window of the cochlea and the fluids were removed with a surgical vacuum drain (Schuco S130A, Allied Healthcare Products, Inc., St. Louis, MO). The cochlear fluid was removed for both ears. For animals connected with a gel channel, one 32-site electrode array was initially inserted into the A1 of the live animal then moved to the SC1 as described in animal surgical preparations section above. The brain of the live animal was then covered with a degassed-agar layer to prevent potential damage from direct contact with the ultrasound gel that connected the live animal with the skull of the dead animal. Transcranial US stimulation was presented to the skull of the dead

animal (Figure 7E). Afterwards, the right and left side skull of the dead animal were both removed. A gel channel was built to connect the left exposed brain of the dead animal with the agar-covered right brain of the live animal. The US stimulation was then performed to the right brain of the dead animal without touching the gel channel (Figure 7H).
